# Supplementary material for: Peel Diffusion and Antifungal Efficacy of Different Fungicides in Pear Fruit: Structure-Diffusion-Activity Relationships
Source: MDPI journal article supplement (doi:10.3390/jof8050547), 2022-05-23
Supplement: s1 [file s1]

## Supplementary Information

### Peel Diffusion and Antifungal Efficacy of Different Fungicides in Pear Fruit: Structure-Diffusion-Activity Relationships

Gui-Yang Zhu <sup>1,†</sup>, Ying Chen <sup>1,†</sup>, Su-Yan Wang <sup>1</sup>, Xin-Chi Shi <sup>1</sup>, Daniela D. Herrera-Balandrano <sup>1</sup>, Victor Polo <sup>2,\*</sup> and Pedro Laborda <sup>1,\*</sup>

<sup>1</sup> School of Life Sciences, Nantong University, Nantong 226019, P. R. China

<sup>2</sup> Departamento de Química Física – Instituto de Biocomputación y Física de Sistemas Complejos (BIFI), Universidad de Zaragoza, Zaragoza 50009, Spain

<sup>†</sup> These authors contributed equally to this work.

\* Correspondence to: P Laborda, School of Life Sciences, Nantong University, Nantong 226019, P. R. China. E-mail: pedro@ntu.edu.cn; V Polo, Departamento de Química Física – Instituto de Biocomputación y Física de Sistemas Complejos (BIFI), Universidad de Zaragoza, Zaragoza 50009, Spain. E-mail: vipolo@unizar.es

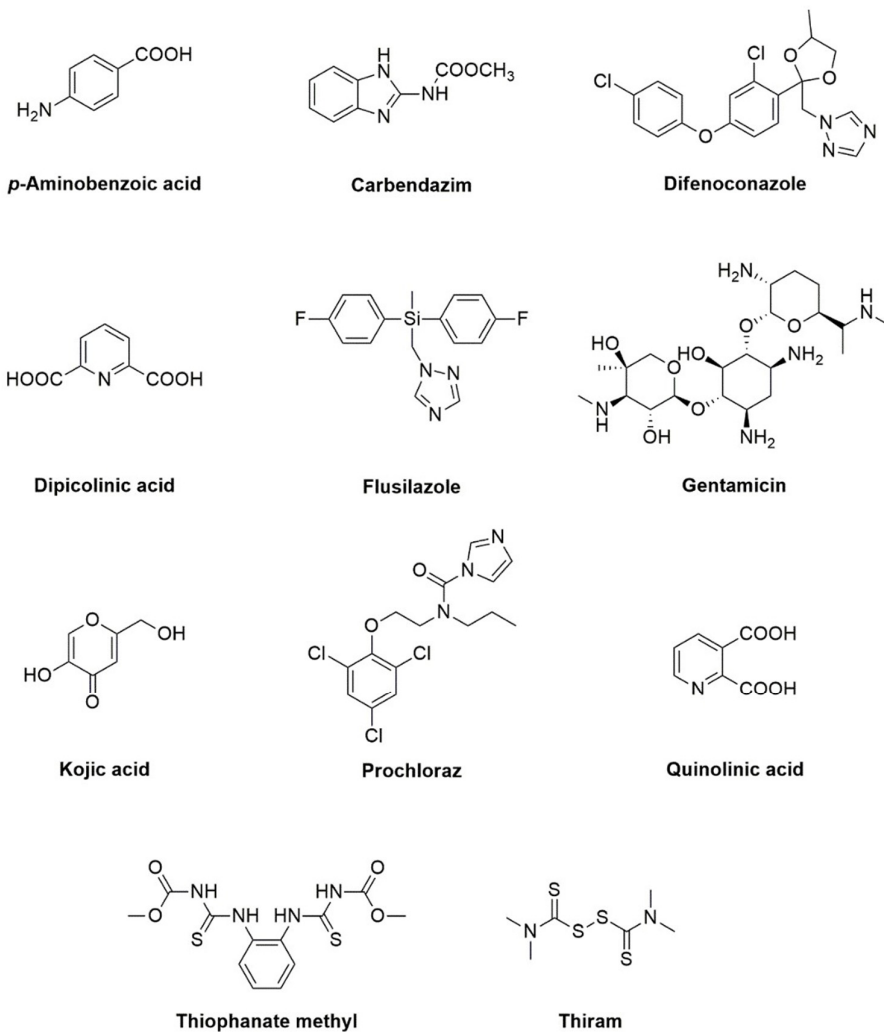

**Figure S1.** Structures of the studied fungicides.

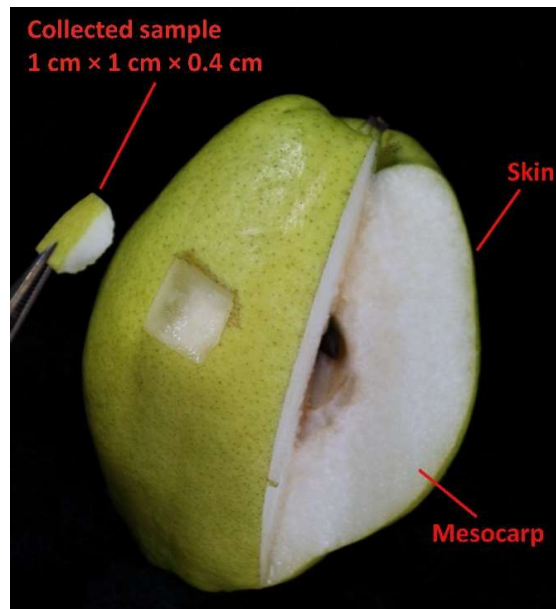

**Figure S2.** Extraction of samples from pears.

**Table S1.** DFT absolute energies (in a.u.) for the optimized structures calculated at the M062X(SMD)/6-311G(d,p) level.

| <b>Compound</b>             | <b>Energy</b> |
|-----------------------------|---------------|
| <i>p</i> -Aminobenzoic acid | -476.12605    |
| Carbendazim                 | -663.05413    |
| Difenoconazole              | -2044.41503   |
| Dipicolinic acid            | -625.38770    |
| Flusilazole                 | -1272.05188   |
| Gentamicin                  | -1586.97382   |
| Kojic acid                  | -533.06635    |
| Prochloraz                  | -2276.40178   |
| Quinolinic acid             | -625.38128    |
| Thiophanate methyl          | -1781.92663   |
| Thiram                      | -1938.03024   |

**Table S2.** Cartesian coordinates (in a.u.) for all optimized structures (**A:** *p*-aminobenzoic acid; **B:** carbendazim; **C:** difenoconazole; **D:** dipicolinic acid; **E:** flusilazole; **F:** gentamicin; **G:** kojic acid; **H:** prochloraz; **I:** quinolinic acid; **J:** thiophanate methyl; and **K:** thiram).

**A:**

|   |           |           |           |
|---|-----------|-----------|-----------|
| 6 | -2.107167 | -0.036632 | 0.000043  |
| 6 | -1.375504 | -1.221596 | 0.000095  |
| 6 | 0.012703  | -1.193388 | 0.000057  |
| 6 | 0.678874  | 0.030227  | 0.000005  |
| 6 | -0.045564 | 1.221597  | -0.000018 |
| 6 | -1.430637 | 1.186021  | -0.000015 |
| 1 | -1.920784 | -2.156943 | 0.000188  |
| 1 | 0.583467  | -2.113041 | 0.000100  |
| 1 | 0.496173  | 2.159671  | -0.000065 |
| 1 | -2.001829 | 2.108264  | -0.000065 |
| 6 | 2.162608  | 0.120445  | -0.000025 |
| 8 | 2.787256  | 1.146535  | 0.000037  |
| 8 | 2.761423  | -1.086064 | -0.000072 |
| 1 | 3.712623  | -0.919538 | -0.000073 |
| 7 | -3.541940 | -0.128234 | 0.000066  |
| 1 | -3.918743 | 0.348747  | 0.812838  |
| 1 | -3.918643 | 0.346662  | -0.813973 |

**B:**

|   |          |           |           |
|---|----------|-----------|-----------|
| 6 | 4.187364 | -0.312401 | 0.000047  |
| 6 | 3.170160 | -1.253918 | -0.000059 |
| 6 | 1.853097 | -0.795586 | -0.000058 |
| 6 | 1.596199 | 0.589404  | 0.000042  |
| 6 | 2.609246 | 1.540862  | 0.000144  |

|   |           |           |           |
|---|-----------|-----------|-----------|
| 6 | 3.912047  | 1.063763  | 0.000143  |
| 1 | 5.219015  | -0.642724 | 0.000059  |
| 1 | 3.374311  | -2.317109 | -0.000123 |
| 1 | 2.394977  | 2.602364  | 0.000191  |
| 1 | 4.734255  | 1.768638  | 0.000228  |
| 1 | -0.375625 | 1.511950  | -0.000122 |
| 6 | -0.253324 | -0.586748 | -0.000101 |
| 7 | 0.662418  | -1.508560 | -0.000099 |
| 7 | 0.215129  | 0.693180  | 0.000004  |
| 7 | -1.608476 | -0.880026 | -0.000132 |
| 1 | -1.845742 | -1.861181 | 0.000903  |
| 6 | -2.610316 | 0.049108  | -0.000127 |
| 8 | -2.451023 | 1.246480  | -0.000443 |
| 8 | -3.800183 | -0.559540 | 0.000205  |
| 6 | -4.924136 | 0.325121  | 0.000233  |
| 1 | -4.908827 | 0.955649  | -0.888510 |
| 1 | -5.799191 | -0.318220 | 0.000051  |
| 1 | -4.909051 | 0.955324  | 0.889223  |

**C:**

|   |          |           |           |
|---|----------|-----------|-----------|
| 6 | 6.194014 | -0.623604 | 0.163517  |
| 6 | 6.177070 | 0.560583  | -0.559212 |
| 6 | 5.059236 | 1.383040  | -0.494916 |
| 6 | 3.981056 | 1.016080  | 0.297833  |
| 6 | 4.005182 | -0.166076 | 1.030675  |
| 6 | 5.117117 | -0.993201 | 0.959288  |
| 1 | 7.027946 | 0.832116  | -1.170238 |
| 1 | 5.013113 | 2.312478  | -1.047810 |
| 1 | 3.159524 | -0.435172 | 1.652036  |

|    |           |           |           |
|----|-----------|-----------|-----------|
| 1  | 5.153496  | -1.916719 | 1.522103  |
| 17 | 7.590613  | -1.663353 | 0.073321  |
| 8  | 2.922927  | 1.894153  | 0.381523  |
| 6  | 1.644827  | 1.410878  | 0.285406  |
| 6  | 1.317706  | 0.329294  | -0.524806 |
| 6  | 0.657506  | 2.084429  | 0.991925  |
| 6  | -0.006741 | -0.078541 | -0.609223 |
| 1  | 2.080358  | -0.192883 | -1.087886 |
| 6  | -0.658823 | 1.664462  | 0.882717  |
| 1  | 0.936563  | 2.927270  | 1.610803  |
| 6  | -1.026033 | 0.577949  | 0.086979  |
| 1  | -1.438020 | 2.180572  | 1.427616  |
| 17 | -0.333665 | -1.446238 | -1.642244 |
| 6  | -2.491088 | 0.140559  | 0.027900  |
| 6  | -4.142805 | 1.726718  | -0.369560 |
| 6  | -3.480998 | 1.253471  | -1.659382 |
| 1  | -5.141863 | 1.285582  | -0.276388 |
| 1  | -4.176519 | 1.100259  | -2.481894 |
| 1  | -2.678836 | 1.938409  | -1.965037 |
| 6  | -2.713299 | -1.176498 | 0.780505  |
| 1  | -2.146850 | -1.983537 | 0.320851  |
| 1  | -2.394889 | -1.040323 | 1.815412  |
| 6  | -5.142957 | -1.020571 | 1.426360  |
| 7  | -4.564129 | -2.465336 | -0.131228 |
| 1  | -5.010262 | -0.255562 | 2.175465  |
| 6  | -5.862150 | -2.439779 | 0.080294  |
| 1  | -6.537186 | -3.078077 | -0.467513 |
| 7  | -6.274431 | -1.562214 | 1.034554  |
| 7  | -4.107727 | -1.551035 | 0.745323  |

|   |           |           |           |
|---|-----------|-----------|-----------|
| 6 | -4.187140 | 3.226329  | -0.180751 |
| 1 | -4.817740 | 3.684948  | -0.945739 |
| 1 | -4.599443 | 3.476818  | 0.797206  |
| 1 | -3.180896 | 3.644552  | -0.256020 |
| 8 | -3.303557 | 1.132831  | 0.632247  |
| 8 | -2.949706 | -0.004575 | -1.286911 |

**D:**

|   |           |           |           |
|---|-----------|-----------|-----------|
| 6 | 1.194091  | 1.544409  | -0.000020 |
| 6 | 0.000005  | 2.250610  | 0.000017  |
| 6 | -1.194071 | 1.544429  | 0.000044  |
| 6 | -1.134755 | 0.150480  | 0.000036  |
| 6 | 1.134777  | 0.150483  | -0.000049 |
| 1 | 2.152615  | 2.044412  | -0.000036 |
| 1 | 0.000025  | 3.333581  | 0.000031  |
| 1 | -2.152604 | 2.044415  | 0.000069  |
| 6 | -2.391812 | -0.679487 | 0.000012  |
| 6 | 2.391808  | -0.679497 | -0.000068 |
| 7 | 0.000000  | -0.537314 | -0.000013 |
| 8 | -2.432278 | -1.870728 | -0.000028 |
| 8 | 2.432259  | -1.870734 | 0.000086  |
| 8 | -3.494808 | 0.098625  | -0.000014 |
| 1 | -4.254323 | -0.498000 | -0.000036 |
| 8 | 3.494792  | 0.098616  | -0.000020 |
| 1 | 4.254310  | -0.498005 | 0.000046  |

**E:**

|    |           |           |          |
|----|-----------|-----------|----------|
| 14 | -0.274547 | -0.718501 | 0.577166 |
| 6  | -0.075727 | -1.382198 | 2.311700 |



|   |           |           |           |
|---|-----------|-----------|-----------|
| 1 | -0.436235 | -0.654463 | 3.042837  |
| 1 | -0.649393 | -2.304003 | 2.433336  |
| 1 | 0.970651  | -1.609634 | 2.522540  |
| 6 | 0.362732  | -1.992339 | -0.702404 |
| 1 | -0.072931 | -2.984527 | -0.562771 |
| 1 | 0.127942  | -1.655499 | -1.715153 |
| 6 | -2.077801 | -0.367195 | 0.192083  |
| 6 | -2.769369 | 0.608700  | 0.924610  |
| 6 | -2.785236 | -1.064308 | -0.793752 |
| 6 | -4.108730 | 0.885652  | 0.685429  |
| 1 | -2.253438 | 1.172335  | 1.696957  |
| 6 | -4.128205 | -0.806542 | -1.048176 |
| 1 | -2.292291 | -1.832129 | -1.381623 |
| 6 | -4.764203 | 0.167032  | -0.300690 |
| 1 | -4.650157 | 1.638979  | 1.243470  |
| 1 | -4.683137 | -1.342127 | -1.807879 |
| 6 | 0.758894  | 0.824628  | 0.318220  |
| 6 | 0.249542  | 1.973915  | -0.298164 |
| 6 | 2.111698  | 0.822274  | 0.692531  |
| 6 | 1.050027  | 3.087383  | -0.528909 |
| 1 | -0.791204 | 2.006739  | -0.604867 |
| 6 | 2.929684  | 1.920000  | 0.461361  |
| 1 | 2.545995  | -0.054006 | 1.167066  |
| 6 | 2.377544  | 3.036207  | -0.143768 |
| 1 | 0.666936  | 3.984297  | -0.998824 |
| 1 | 3.977120  | 1.922869  | 0.735142  |
| 9 | 3.156696  | 4.104435  | -0.365137 |
| 9 | -6.057604 | 0.425471  | -0.537145 |
| 7 | 1.810615  | -2.112851 | -0.612594 |

|   |          |           |           |
|---|----------|-----------|-----------|
| 6 | 2.758818 | -1.624420 | -1.430288 |
| 6 | 3.678150 | -2.504575 | 0.217388  |
| 1 | 2.526800 | -1.111567 | -2.351171 |
| 1 | 4.434920 | -2.866572 | 0.895763  |
| 7 | 2.390805 | -2.674043 | 0.463595  |
| 7 | 3.959057 | -1.859694 | -0.939234 |

**F:**

|   |           |           |           |
|---|-----------|-----------|-----------|
| 6 | -3.851123 | 0.643976  | -0.222525 |
| 6 | -2.782228 | -0.325537 | 0.287057  |
| 6 | -4.344041 | -1.941075 | 0.810121  |
| 6 | -5.573055 | -1.110308 | 0.409030  |
| 6 | -5.120626 | -0.103073 | -0.665753 |
| 1 | -2.425568 | -0.952942 | -0.545363 |
| 1 | -3.436218 | 1.175797  | -1.094373 |
| 1 | -4.020740 | -2.526442 | -0.063014 |
| 1 | -4.615724 | -2.634437 | 1.610098  |
| 1 | -4.877440 | -0.712576 | -1.552513 |
| 6 | 0.466354  | -0.159491 | 0.019386  |
| 6 | -0.710486 | 0.798582  | -0.034697 |
| 6 | -0.320486 | 2.209328  | 0.384612  |
| 6 | 0.865001  | 2.699083  | -0.442138 |
| 6 | 2.079434  | 1.759749  | -0.397772 |
| 6 | 1.626115  | 0.367349  | -0.836528 |
| 1 | -1.097552 | 0.839556  | -1.062637 |
| 1 | 0.757763  | -0.214410 | 1.076892  |
| 1 | 0.532250  | 2.805774  | -1.482570 |
| 1 | 1.164141  | 3.696437  | -0.102443 |
| 1 | 2.464937  | 1.692390  | 0.627381  |

|   |           |           |           |
|---|-----------|-----------|-----------|
| 1 | 1.256131  | 0.435963  | -1.867851 |
| 1 | -0.016837 | 2.149176  | 1.443161  |
| 8 | -1.719807 | 0.367040  | 0.862448  |
| 6 | 3.274553  | -1.025989 | 0.263736  |
| 6 | 3.684379  | -2.472216 | -0.009617 |
| 6 | 4.833486  | -2.490793 | -1.017368 |
| 6 | 5.964452  | -1.580427 | -0.536043 |
| 6 | 5.445765  | -0.174494 | -0.249795 |
| 1 | 5.187035  | -3.515904 | -1.161064 |
| 1 | 4.022532  | -2.895733 | 0.940998  |
| 1 | 2.569166  | -1.001450 | 1.096687  |
| 1 | 6.412859  | -1.971339 | 0.381098  |
| 1 | 6.754167  | -1.518074 | -1.290286 |
| 1 | 5.089393  | 0.306515  | -1.167792 |
| 1 | 4.449687  | -2.131787 | -1.978817 |
| 8 | 2.677833  | -0.580795 | -0.927128 |
| 8 | -6.492201 | -1.990252 | -0.237228 |
| 1 | -6.875408 | -2.559821 | 0.436045  |
| 8 | -4.145200 | 1.574296  | 0.798316  |
| 1 | -5.041234 | 1.886327  | 0.610629  |
| 8 | 0.037395  | -1.417605 | -0.443042 |
| 1 | 0.731791  | -2.071316 | -0.253796 |
| 6 | -6.196904 | -0.462859 | 1.638479  |
| 1 | -6.979115 | 0.243566  | 1.358190  |
| 1 | -6.633433 | -1.239627 | 2.275366  |
| 1 | -5.430768 | 0.061527  | 2.208973  |
| 8 | 4.344809  | -0.223159 | 0.670178  |
| 8 | -3.293687 | -1.144567 | 1.301138  |
| 7 | 2.473894  | -3.186889 | -0.431527 |

|   |           |           |           |
|---|-----------|-----------|-----------|
| 1 | 2.312447  | -2.988151 | -1.415488 |
| 1 | 2.600756  | -4.188697 | -0.342779 |
| 7 | 3.189116  | 2.196260  | -1.243539 |
| 1 | 2.860818  | 2.302463  | -2.200201 |
| 1 | 3.505832  | 3.112510  | -0.942072 |
| 7 | -1.480595 | 3.067783  | 0.170243  |
| 1 | -2.270669 | 2.703254  | 0.701327  |
| 1 | -1.290537 | 4.002047  | 0.516642  |
| 7 | -6.117664 | 0.925287  | -0.964475 |
| 1 | -5.701530 | 1.551378  | -1.648723 |
| 6 | 6.497609  | 0.713893  | 0.415151  |
| 1 | 7.381251  | 0.693022  | -0.233365 |
| 6 | 6.008459  | 2.157951  | 0.535727  |
| 1 | 5.809465  | 2.586716  | -0.448635 |
| 1 | 5.081771  | 2.184953  | 1.114882  |
| 1 | 6.758734  | 2.770790  | 1.042010  |
| 7 | 6.878249  | 0.108657  | 1.693627  |
| 1 | 7.555418  | 0.697975  | 2.165206  |
| 1 | 6.051521  | 0.072469  | 2.283510  |
| 6 | -7.392467 | 0.447234  | -1.501672 |
| 1 | -7.269739 | -0.267667 | -2.325302 |
| 1 | -7.964141 | -0.051579 | -0.721535 |
| 1 | -7.962491 | 1.308707  | -1.852593 |

**G:**

|   |           |           |          |
|---|-----------|-----------|----------|
| 6 | 1.653815  | -0.414409 | 0.000030 |
| 6 | 1.028581  | 0.919810  | 0.000007 |
| 6 | -0.417799 | 0.899626  | 0.000029 |
| 6 | -1.072618 | -0.277399 | 0.000001 |

|   |           |           |           |
|---|-----------|-----------|-----------|
| 6 | 0.900791  | -1.524379 | -0.000026 |
| 1 | -0.980369 | 1.821703  | 0.000068  |
| 1 | 1.279949  | -2.534587 | -0.000047 |
| 8 | 2.995499  | -0.436490 | 0.000045  |
| 1 | 3.255398  | 0.500707  | -0.000005 |
| 6 | -2.561715 | -0.446105 | 0.000054  |
| 1 | -2.831676 | -1.032911 | 0.887508  |
| 1 | -2.831742 | -1.033347 | -0.887105 |
| 8 | -3.155764 | 0.826454  | -0.000235 |
| 1 | -4.108450 | 0.718993  | 0.001214  |
| 8 | 1.749684  | 1.907336  | -0.000022 |
| 8 | -0.460600 | -1.470227 | -0.000063 |

**H:**

|    |           |           |           |
|----|-----------|-----------|-----------|
| 6  | -4.474391 | 0.398774  | -0.459639 |
| 6  | -4.178778 | -0.899049 | -0.070604 |
| 6  | -2.927834 | -1.163410 | 0.466813  |
| 6  | -1.977042 | -0.156307 | 0.635752  |
| 6  | -2.312921 | 1.134767  | 0.222371  |
| 6  | -3.554192 | 1.427832  | -0.320285 |
| 1  | -4.904418 | -1.692150 | -0.185971 |
| 1  | -3.796093 | 2.436762  | -0.624754 |
| 17 | -1.137629 | 2.395508  | 0.417015  |
| 17 | -6.037904 | 0.744381  | -1.136323 |
| 17 | -2.527742 | -2.777337 | 0.956652  |
| 8  | -0.776422 | -0.409531 | 1.208054  |
| 6  | 0.282534  | -0.689759 | 0.289984  |
| 1  | 0.216609  | -1.733483 | -0.037554 |
| 1  | 0.201991  | -0.044710 | -0.590746 |

|   |          |           |           |
|---|----------|-----------|-----------|
| 6 | 1.574666 | -0.423647 | 1.043750  |
| 1 | 1.559325 | -1.000633 | 1.973994  |
| 1 | 1.628384 | 0.629473  | 1.313775  |
| 7 | 2.735949 | -0.818310 | 0.254390  |
| 6 | 3.805811 | -0.009418 | -0.004809 |
| 6 | 4.498402 | 2.339200  | 0.222630  |
| 6 | 2.432290 | 2.082351  | -0.516047 |
| 6 | 2.778417 | 3.397254  | -0.460147 |
| 1 | 1.545160 | 1.586079  | -0.865593 |
| 1 | 2.180275 | 4.249310  | -0.741906 |
| 1 | 5.474835 | 2.049211  | 0.577436  |
| 7 | 4.065856 | 3.546267  | 0.011521  |
| 7 | 3.543337 | 1.390545  | -0.058589 |
| 8 | 4.925223 | -0.413087 | -0.201520 |
| 6 | 3.015822 | -2.259085 | 0.170522  |
| 1 | 3.959456 | -2.467556 | 0.682305  |
| 1 | 2.218340 | -2.776933 | 0.708834  |
| 6 | 3.085201 | -2.758954 | -1.268266 |
| 1 | 2.132987 | -2.548619 | -1.765834 |
| 1 | 3.860899 | -2.197883 | -1.794427 |
| 6 | 3.393457 | -4.252638 | -1.318234 |
| 1 | 3.436842 | -4.611014 | -2.347339 |
| 1 | 4.357176 | -4.465207 | -0.849501 |
| 1 | 2.628840 | -4.832069 | -0.793846 |

**I:**

|   |          |           |           |
|---|----------|-----------|-----------|
| 6 | 2.391538 | 1.233050  | 0.007660  |
| 6 | 2.763158 | -0.106741 | -0.024100 |
| 6 | 1.761946 | -1.062211 | -0.017745 |

|   |           |           |           |
|---|-----------|-----------|-----------|
| 6 | 0.432856  | -0.650313 | 0.016963  |
| 6 | 0.169696  | 0.722900  | 0.022498  |
| 7 | 1.126094  | 1.645790  | 0.024572  |
| 1 | 1.976980  | -2.124093 | -0.032507 |
| 1 | 3.143465  | 2.015731  | 0.016475  |
| 1 | 3.808348  | -0.386326 | -0.046164 |
| 6 | -1.224058 | 1.307853  | -0.002114 |
| 6 | -0.608907 | -1.715968 | 0.075373  |
| 8 | -1.705355 | 1.944998  | 0.883210  |
| 8 | -0.399407 | -2.869380 | -0.176735 |
| 8 | -1.821833 | 1.073203  | -1.179619 |
| 1 | -2.698575 | 1.478959  | -1.136415 |
| 8 | -1.800458 | -1.257786 | 0.482491  |
| 1 | -2.413829 | -2.004508 | 0.480620  |

**J:**

|   |           |           |           |
|---|-----------|-----------|-----------|
| 6 | -0.630824 | 3.291132  | 0.291409  |
| 6 | 0.631401  | 3.290800  | -0.291353 |
| 6 | 1.262268  | 2.090013  | -0.585607 |
| 6 | 0.639996  | 0.877080  | -0.289739 |
| 6 | -0.639960 | 0.877447  | 0.290994  |
| 6 | -1.261965 | 2.090631  | 0.586247  |
| 1 | -1.122966 | 4.225490  | 0.529060  |
| 1 | 1.123789  | 4.224897  | -0.529531 |
| 1 | 2.232101  | 2.080378  | -1.067473 |
| 1 | -2.231820 | 2.081399  | 1.068084  |
| 7 | 1.226940  | -0.370131 | -0.595372 |
| 1 | 0.641449  | -1.053274 | -1.058675 |
| 7 | -1.227319 | -0.369473 | 0.597276  |

|    |           |           |           |
|----|-----------|-----------|-----------|
| 1  | -0.642351 | -1.052270 | 1.061736  |
| 6  | 2.540054  | -0.762468 | -0.501587 |
| 6  | -2.540455 | -0.761563 | 0.502907  |
| 16 | 3.048421  | -2.140588 | -1.251100 |
| 16 | -3.049548 | -2.139264 | 1.252819  |
| 7  | 3.281939  | 0.075422  | 0.306166  |
| 1  | 2.772926  | 0.731921  | 0.885756  |
| 7  | -3.281712 | 0.076198  | -0.305524 |
| 1  | -2.772210 | 0.732174  | -0.885289 |
| 6  | 4.648754  | 0.132627  | 0.595380  |
| 6  | -4.648210 | 0.132664  | -0.596535 |
| 8  | -5.048546 | 0.840408  | -1.480573 |
| 8  | 5.050043  | 0.841472  | 1.478110  |
| 8  | -5.390888 | -0.611256 | 0.197772  |
| 8  | 5.390642  | -0.611979 | -0.199041 |
| 6  | -6.791580 | -0.587848 | -0.094943 |
| 1  | -6.967401 | -0.927218 | -1.115371 |
| 1  | -7.242588 | -1.267749 | 0.621498  |
| 1  | -7.184957 | 0.421582  | 0.023257  |
| 6  | 6.791746  | -0.587443 | 0.091568  |
| 1  | 7.242079  | -1.268022 | -0.624660 |
| 1  | 7.184441  | 0.422024  | -0.028504 |
| 1  | 6.969241  | -0.925395 | 1.112184  |

**K:**

|   |           |           |           |
|---|-----------|-----------|-----------|
| 7 | -3.304807 | 0.481779  | 0.000400  |
| 6 | -2.184844 | -0.263122 | -0.000276 |
| 6 | -4.597015 | -0.198936 | 0.000955  |
| 1 | -4.689905 | -0.833995 | -0.881823 |



|    |           |           |           |
|----|-----------|-----------|-----------|
| 1  | -4.688187 | -0.835684 | 0.882678  |
| 1  | -5.383475 | 0.551944  | 0.002465  |
| 6  | -3.263778 | 1.941940  | 0.001125  |
| 1  | -4.281463 | 2.321817  | 0.000157  |
| 1  | -2.751481 | 2.317558  | 0.891197  |
| 1  | -2.749722 | 2.318296  | -0.887609 |
| 16 | -0.716474 | 0.765787  | -0.000365 |
| 16 | 0.716478  | -0.765682 | -0.000396 |
| 16 | -2.171912 | -1.923742 | -0.001022 |
| 6  | 2.184833  | 0.263124  | -0.000118 |
| 6  | 3.263604  | -1.941992 | 0.001396  |
| 1  | 2.749574  | -2.317385 | 0.890558  |
| 1  | 2.751187  | -2.318485 | -0.888240 |
| 1  | 4.281240  | -2.322001 | 0.002560  |
| 6  | 4.597064  | 0.198746  | 0.000469  |
| 1  | 4.689370  | 0.834106  | -0.882148 |
| 1  | 4.688992  | 0.835178  | 0.882349  |
| 1  | 5.383448  | -0.552217 | 0.001090  |
| 7  | 3.304779  | -0.481830 | 0.000600  |
| 16 | 2.171997  | 1.923803  | -0.000813 |

**A**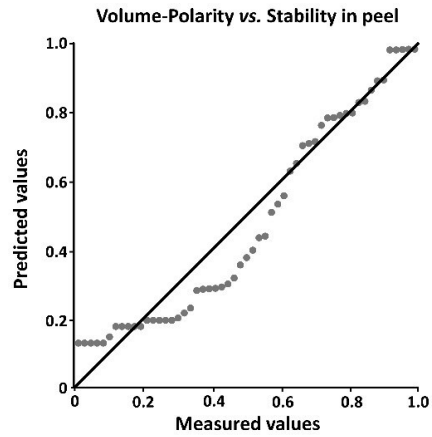**B**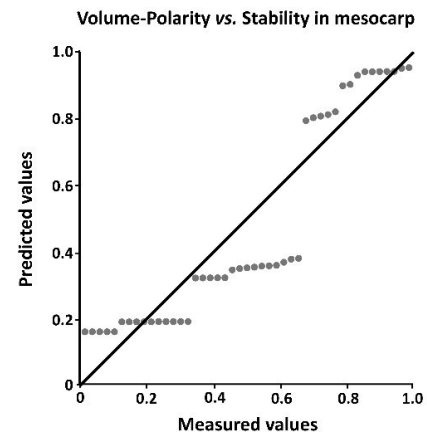

**Figure S3.** Correlations between (A) volume, polarity and stability in pear peel, and (B) volume, polarity and stability in pear mesocarp. Linear regression analyses were performed using SPSS software version 16.0.
